# Supplementary material for: Enhanced immune activation within the tumor microenvironment and circulation of female high-risk melanoma patients and improved survival with adjuvant CTLA4 blockade compared to males
Source: Springer Nature journal article supplement (doi:10.1186/s12967-022-03450-3), 2022-06-03
Supplement: MOESM2 [file 23125414]

Figure S2. Forest plots comparing relapse free survival (RFS) and overall survival (OS) for ipilimumab 10 mg/kg versus high dose interferon-alfa.

### RFS

### OS

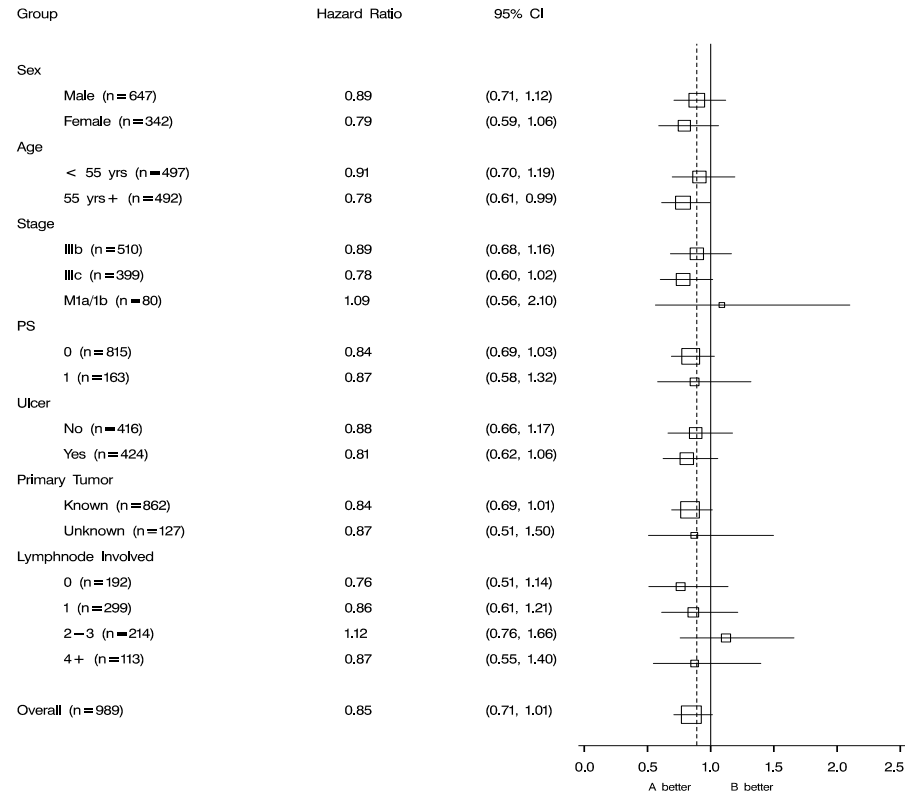

: Boxes represent hazard ratios  
(size of box inversely proportional to SE of HR)  
Bars represent 95% confidence intervals

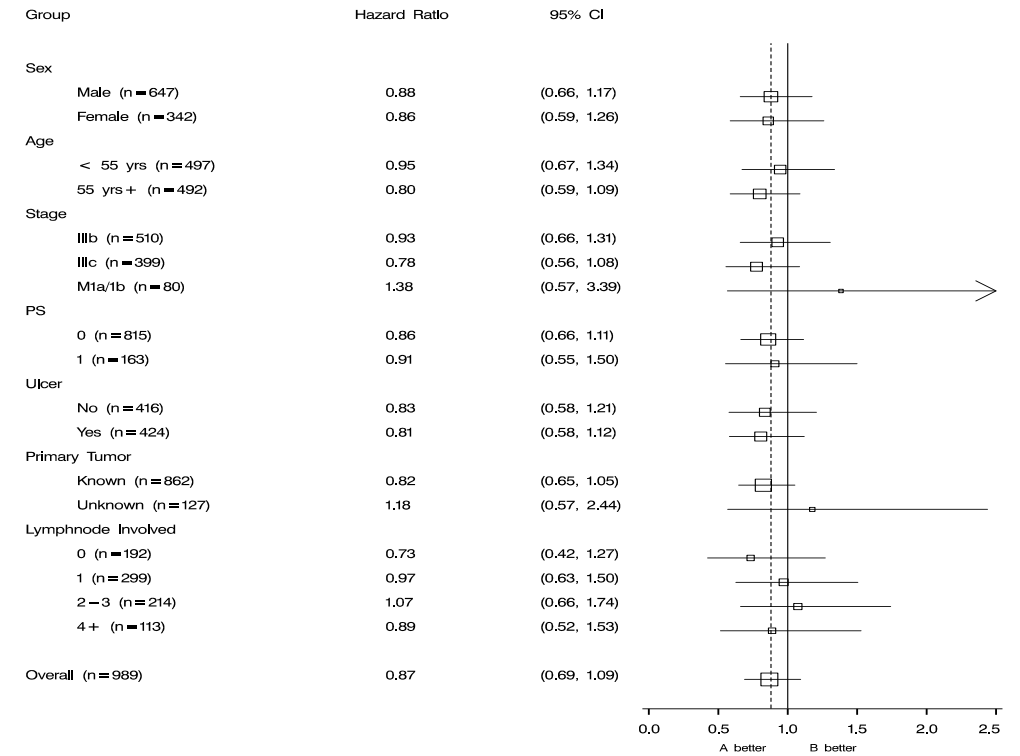

: Boxes represent hazard ratios  
(size of box inversely proportional to SE of HR)  
Bars represent 95% confidence intervals
